# Supplementary material for: Myco–Phycobiont Interactions within the “Ramalina farinacea Group”: A Geographical Survey over Europe and Macaronesia
Source: MDPI journal article supplement (doi:10.3390/jof10030206), 2024-03-08

BIOGEOGRAPHIC MAP OF EUROPE

SALVADOR RIVAS-MARTÍNEZ, ANGEL PENAS & TOMÁS E. DÍAZ (2001, March, 24)

Scale 1:16.000.000 Equidistant Conic Projection Cartographic Service, University of León, Spain. (2001, April, 27)

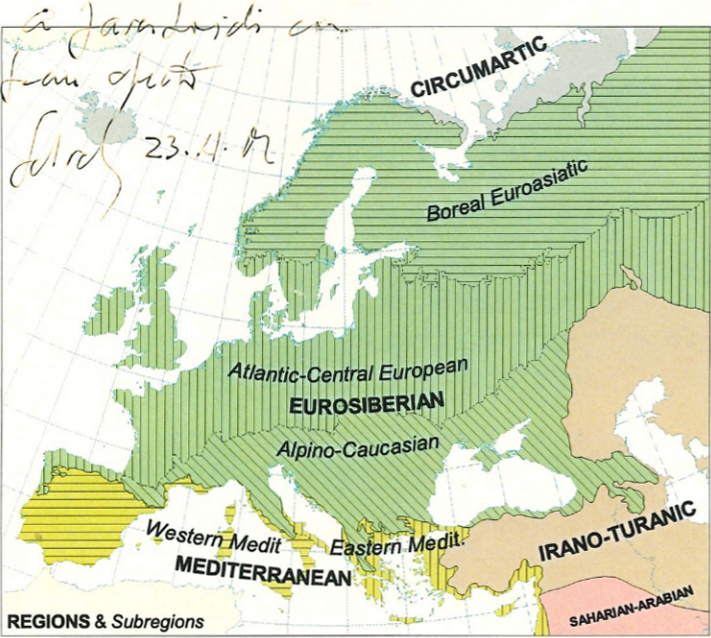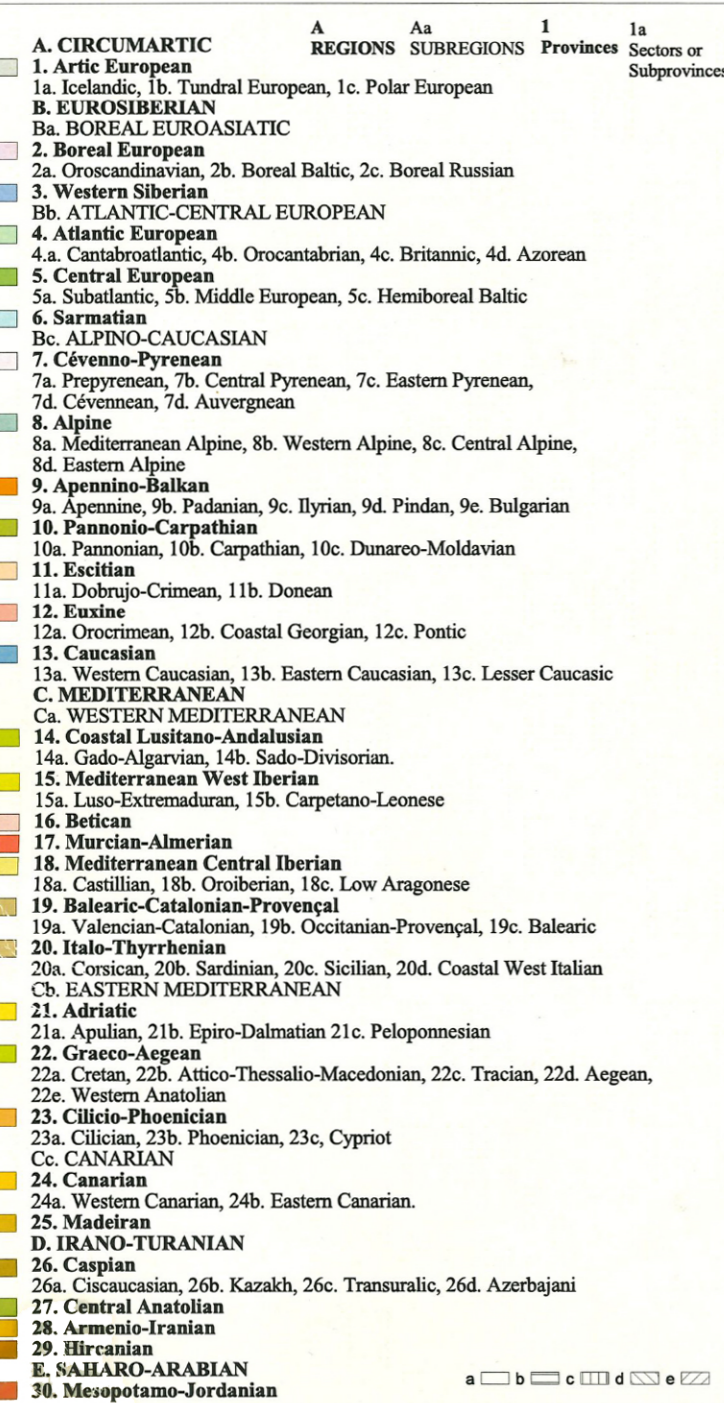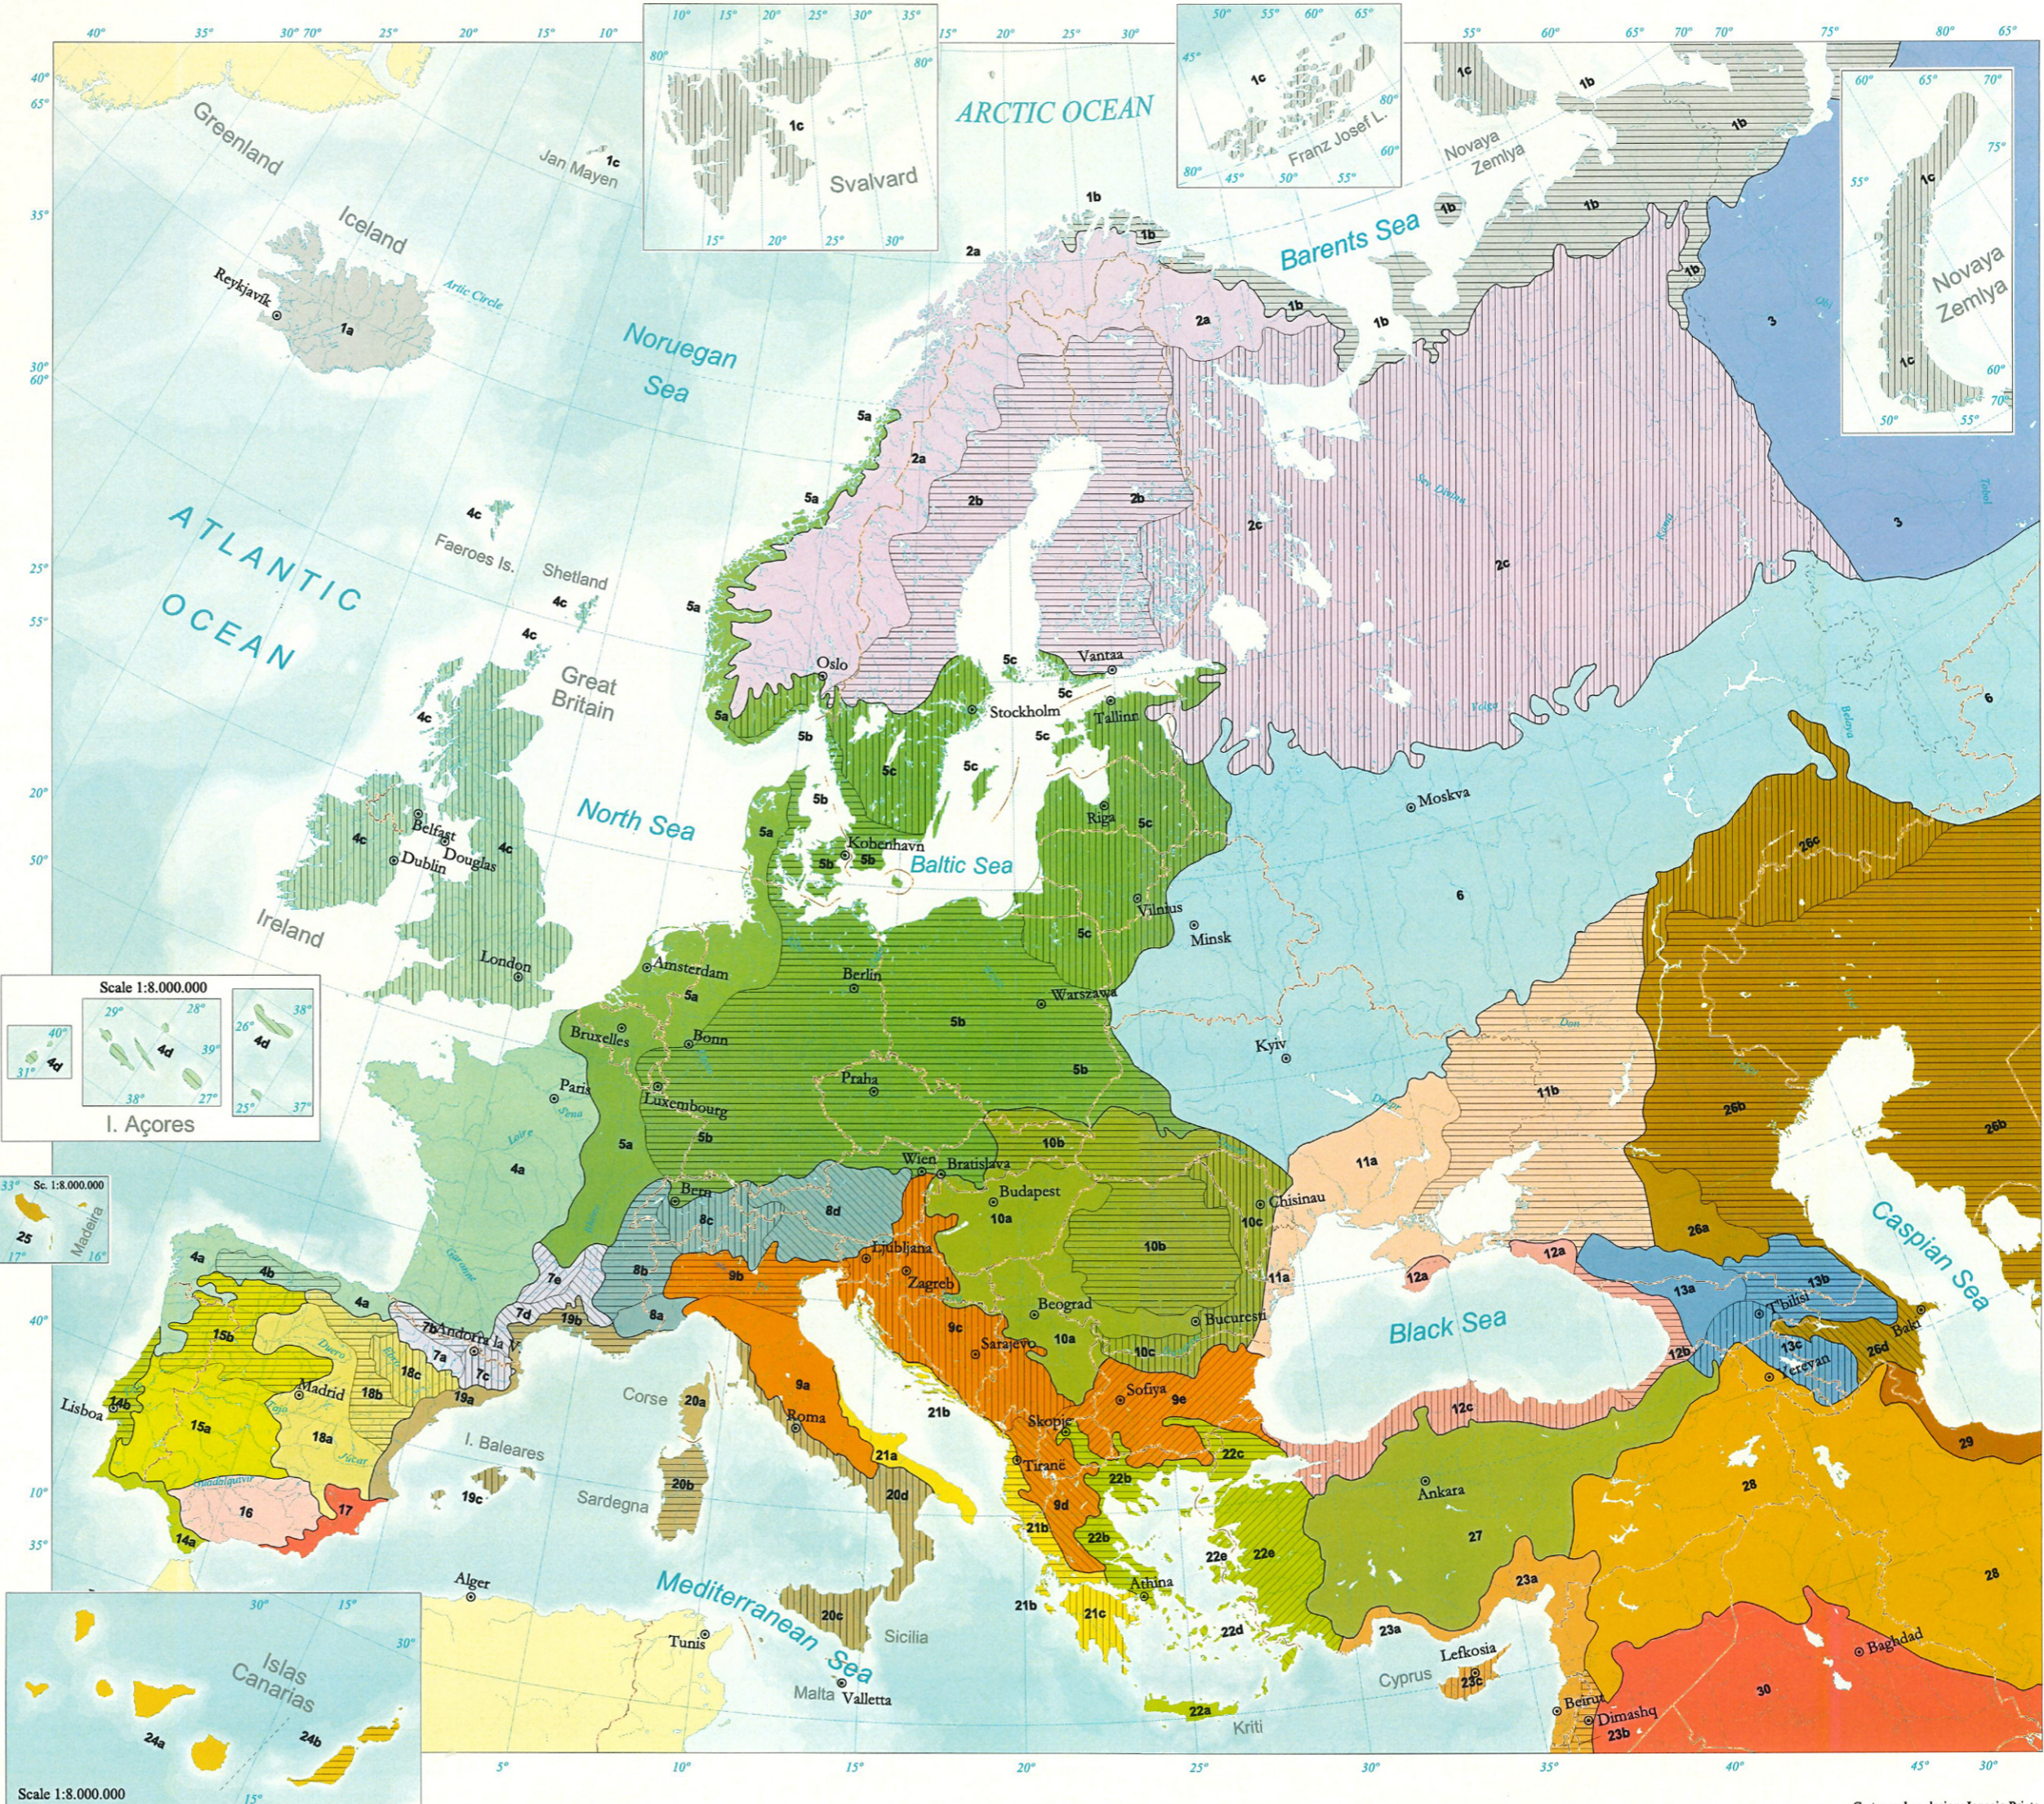

Supplement: s1 [file s1]
