# Supplementary figures and images for: Myco–Phycobiont Interactions within the “Ramalina farinacea Group”: A Geographical Survey over Europe and Macaronesia
Source: MDPI journal article supplement (doi:10.3390/jof10030206), 2024-03-08

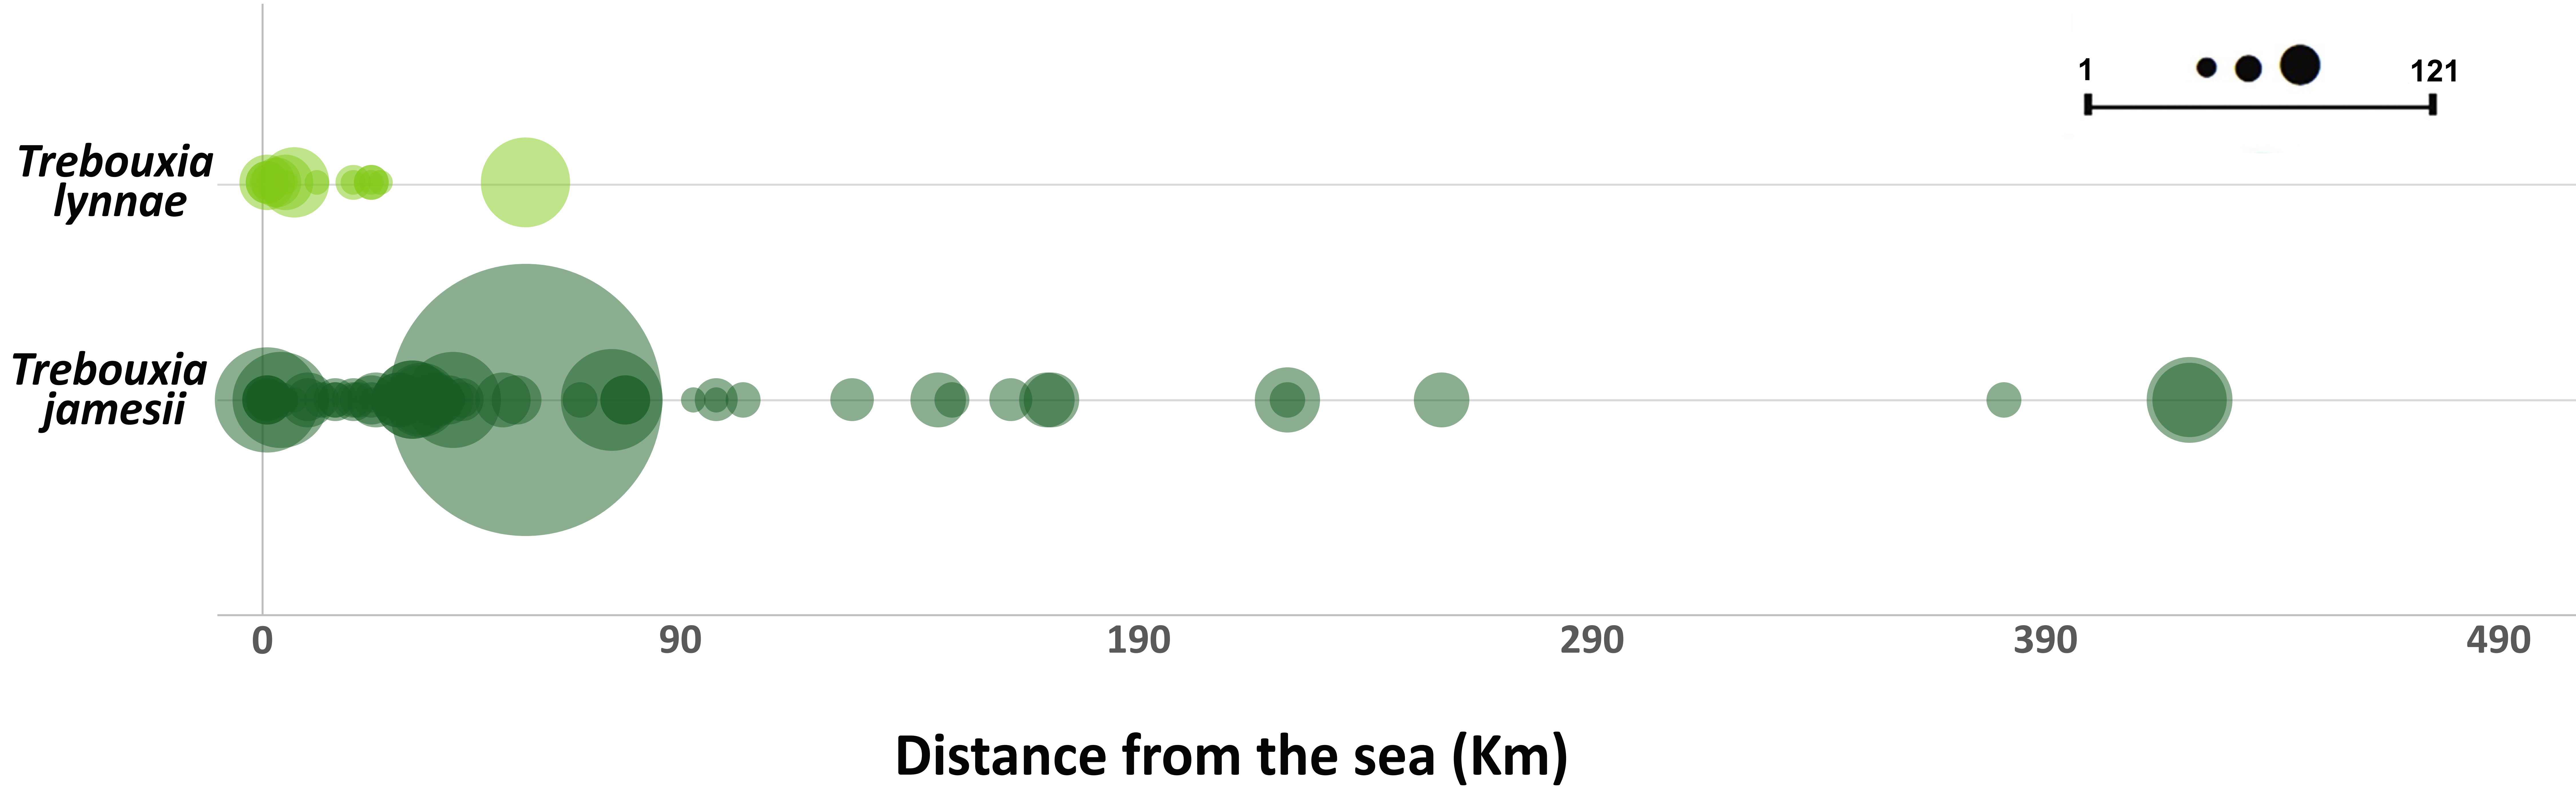

Supplement: s1 [file s1]

*Trebouxia jamesii*

*Trebouxia*  
*lynnae*

Tree scale: 0.1

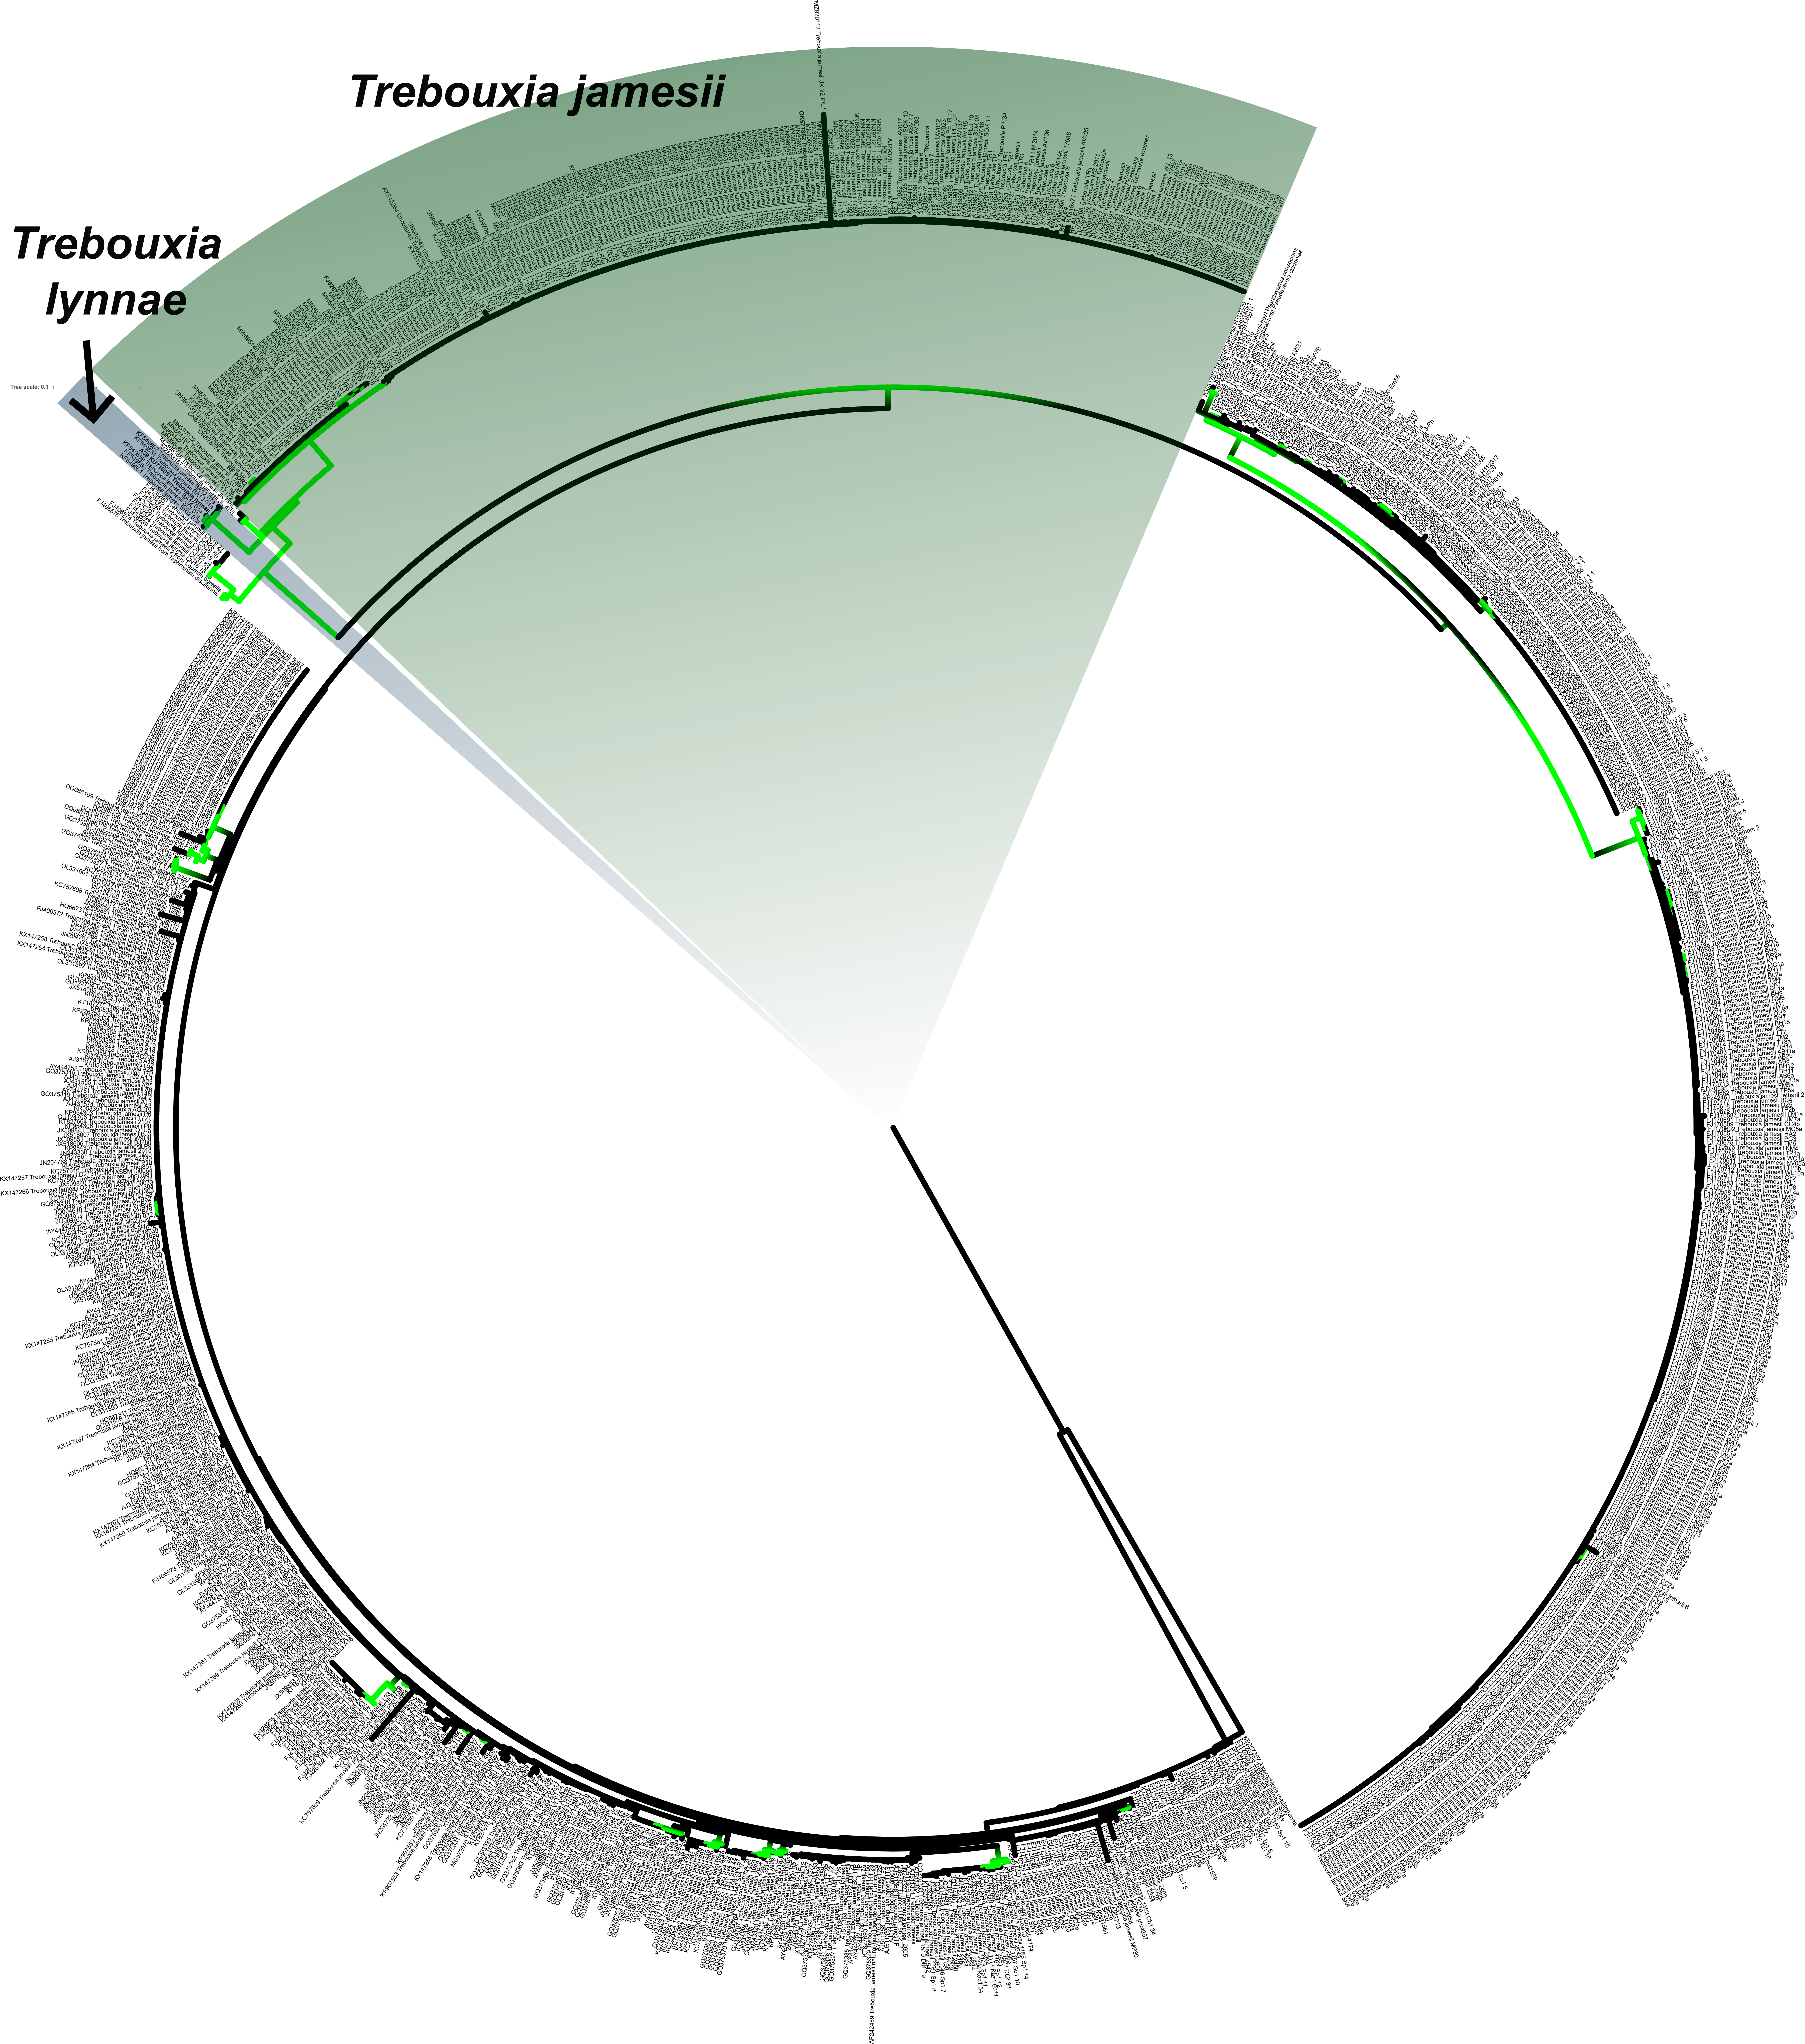

Supplement: s1 [file s1]
